# Supplementary material for: Synthesis of polybenzoxazine based nitrogen-rich porous carbons for carbon dioxide capture
Source: Royal Society of Chemistry journal article supplement (doi:10.1039/c4nr07409b), 2015-01-01
Supplement: c4nr07409b1.pdf [file c4nr07409b1.pdf]

## Electronic Supplementary Information

### **Synthesis of polybenzoxazine based nitrogen-rich porous carbons for carbon dioxide capture**

**Liu Wan**<sup>a,b</sup>, **Jianlong Wang**<sup>a</sup>, **Yahui Sun**<sup>a,b</sup>, **Changming Zhang**<sup>a,b</sup>, **Chong Feng**<sup>a,b</sup>, **Kaixi Li**<sup>a\*</sup>

<sup>a</sup> *Institute of Coal Chemistry, Chinese Academy of Sciences, Taiyuan 030001, P. R. China. E-mail: likx@sxicc.ac.cAddress, Address, Town, Country.*

<sup>b</sup> *Graduate University of Chinese Academy of Sciences, Beijing 100049, P. R. China.*

## Contents

**Table S1.** Elemental and XPS analysis of all samples.

**Table S2.** XPS peak positions and relative content of N species in the NPCs.

**Table S3.** Elemental and XPS analysis of NPC-2 and NPC-2-HCl.

**Fig. S1** DFT fit between the carbon slit adsorption branch kernel (red circle) and the experimental data (nitrogen adsorption, black square) for (a) NPC-0, (b) NPC-1, (c) NPC-2, (d) NPC-3, and (e) NPC-4.

**Fig. S2** XPS spectrum of NPC-0 and NPC-2-HCl (a) survey spectra, and (b) N 1s spectra.

**Fig. S3** (a) N<sub>2</sub> sorption isotherms and (b) DFT pore size distributions for the NPC-2 and NPC-2-HCl.

**Fig. S4** Isothermic heat of CO<sub>2</sub> adsorption for NPC-2 and NPC-2-HCl.

**Fig. S5** CO<sub>2</sub>/N<sub>2</sub> selectivity versus CO<sub>2</sub> molar fraction with the overall pressure of 1.0 bar.

**Table S1** Elemental and XPS analysis of all samples.

| Sample | Elemental analysis (wt. %) |      |      |       | XPS analysis (at. %) |      |      |
|--------|----------------------------|------|------|-------|----------------------|------|------|
|        | C                          | H    | N    | O     | C                    | N    | O    |
| NPC-c  | 78.31                      | 2.33 | 5.67 | 13.69 | 87.90                | 4.51 | 7.59 |
| NPC-0  | 78.28                      | 2.25 | 5.32 | 14.15 | 87.75                | 4.36 | 7.89 |
| NPC-1  | 77.96                      | 2.27 | 5.27 | 14.50 | 87.10                | 4.26 | 8.64 |
| NPC-2  | 77.63                      | 2.22 | 5.25 | 14.90 | 87.05                | 4.24 | 8.87 |
| NPC-3  | 77.60                      | 2.20 | 5.24 | 14.96 | 86.75                | 4.23 | 9.02 |
| NPC-4  | 77.54                      | 2.15 | 5.21 | 15.10 | 86.59                | 4.18 | 9.23 |

**Table S2** XPS peak positions and relative content of N species in the NPCs.

| Sample | N-6      | N-5      | N-Q    | N-X    |
|--------|----------|----------|--------|--------|
|        | 398.5 eV | 400.2 eV | 401 eV | 403 eV |
| NPC-c  | 32.51    | 51.18    | 11.18  | 5.14   |
| NPC-0  | 33.72    | 44.17    | 13.43  | 8.68   |
| NPC-1  | 30.98    | 51.43    | 12.19  | 5.39   |
| NPC-2  | 29.08    | 54.54    | 12.86  | 3.51   |
| NPC-3  | 25.37    | 56.26    | 13.75  | 4.62   |
| NPC-4  | 21.47    | 59.27    | 14.19  | 5.07   |

**Table S3** Elemental and XPS analysis of NPC-2 and NPC-2-HCl.

| Sample    | Elemental analysis (wt. %) |      |      |       | XPS analysis (at. %) |      |      |      |
|-----------|----------------------------|------|------|-------|----------------------|------|------|------|
|           | C                          | H    | N    | O     | C                    | N    | O    | Cl   |
| NPC-2     | 77.63                      | 2.22 | 5.25 | 14.90 | 87.05                | 4.24 | 8.87 | -    |
| NPC-2-HCl | 76.55                      | 2.84 | 5.22 | 15.38 | 83.14                | 4.05 | 9.75 | 3.06 |

**Table S4** The textural properties and CO<sub>2</sub> uptakes of NPC-2 and NPC-2-HCl.

| Sample    | S <sub>BET</sub><br>(m <sup>2</sup> g <sup>-1</sup> ) | S <sub>micro</sub><br>(m <sup>2</sup> g <sup>-1</sup> ) | V <sub>total</sub><br>(cm <sup>3</sup> g <sup>-1</sup> ) | CO <sub>2</sub> uptake (mmol g <sup>-1</sup> ) |       | CO <sub>2</sub> uptake/S <sub>BET</sub> (μmol m <sup>-2</sup> ) |       |
|-----------|-------------------------------------------------------|---------------------------------------------------------|----------------------------------------------------------|------------------------------------------------|-------|-----------------------------------------------------------------|-------|
|           |                                                       |                                                         |                                                          | 0 °C                                           | 25 °C | 0 °C                                                            | 25 °C |
| NPC-2     | 1255.9                                                | 1108.4                                                  | 0.63                                                     | 6.35                                           | 4.02  | 5.06                                                            | 3.20  |
| NPC-2-HCl | 1171.3                                                | 1056.5                                                  | 0.60                                                     | 4.79                                           | 3.09  | 4.09                                                            | 2.64  |

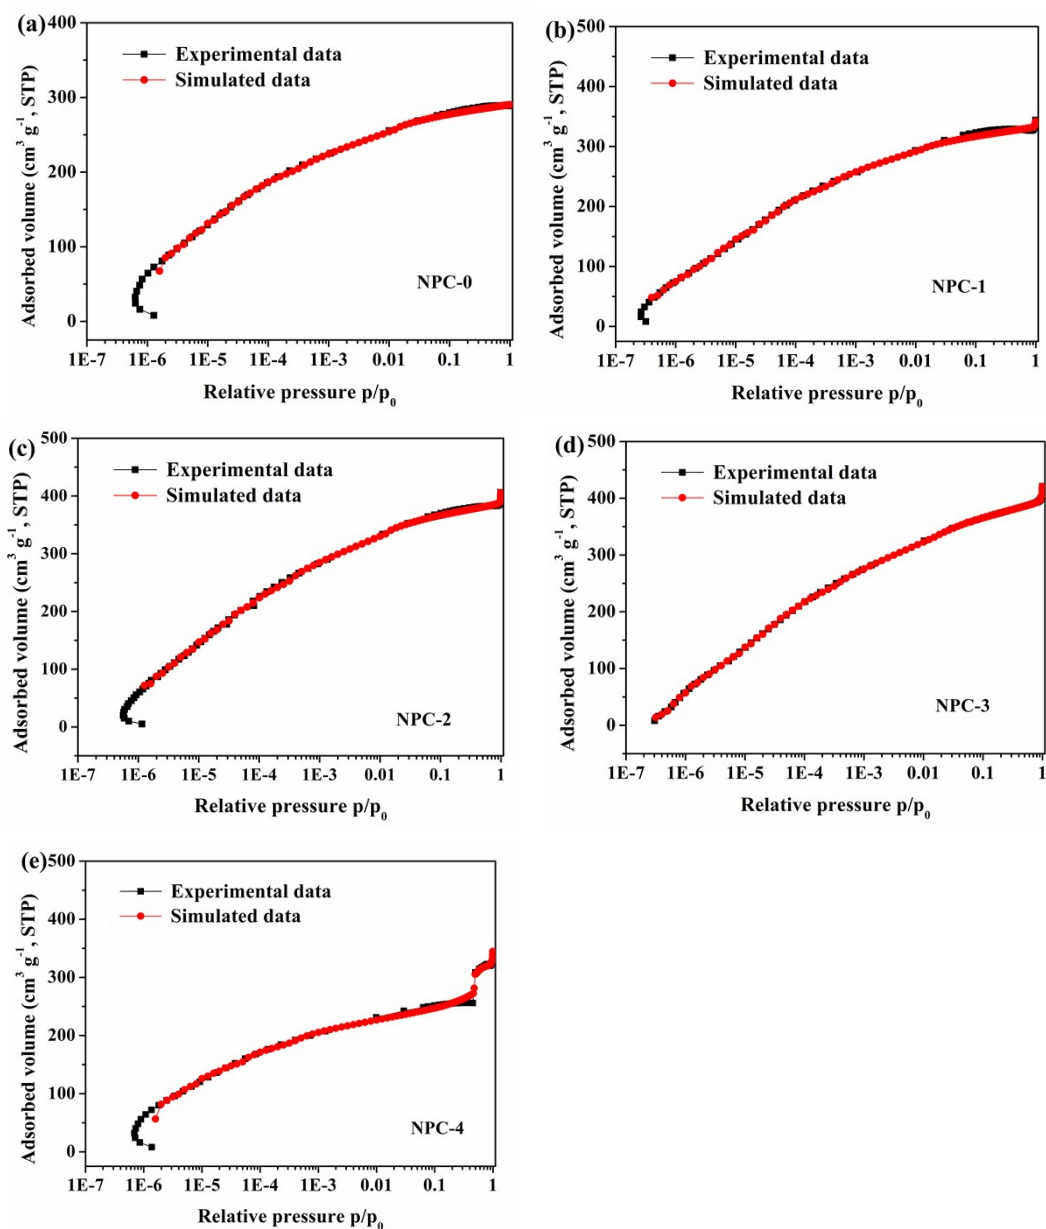

**Fig. S1** DFT fit between the carbon slit adsorption branch kernel (red circle) and the experimental data (nitrogen adsorption, black square) for (a) NPC-0, (b) NPC-1, (c) NPC-2, (d) NPC-3, and (e) NPC-4.

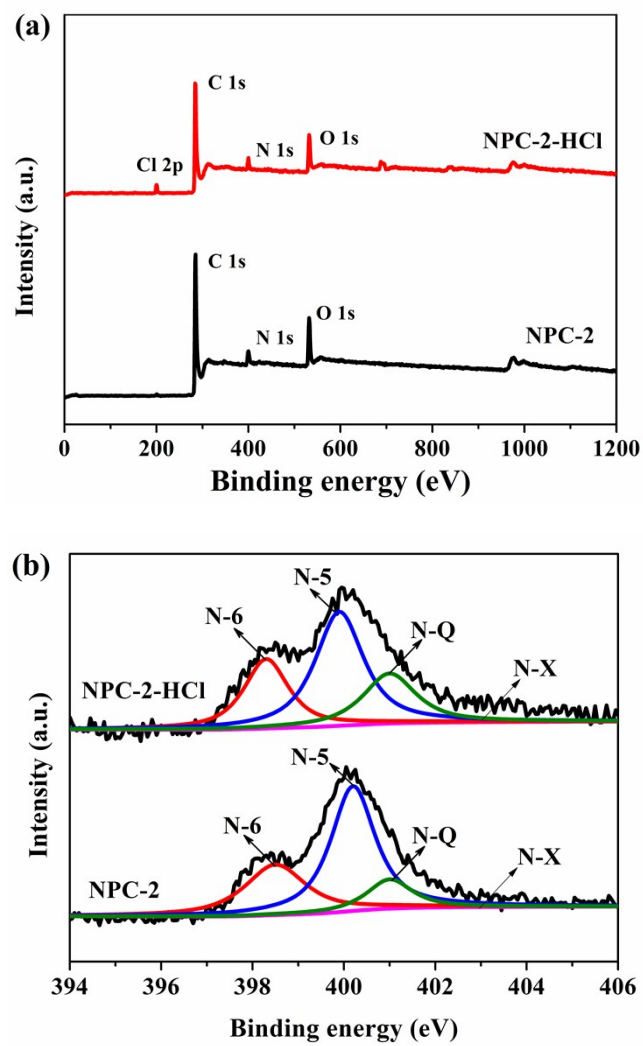

**Fig. S2** XPS spectrum of NPC-0 and NPC-2-HCl (a) survey spectra, and (b) N 1s spectra.



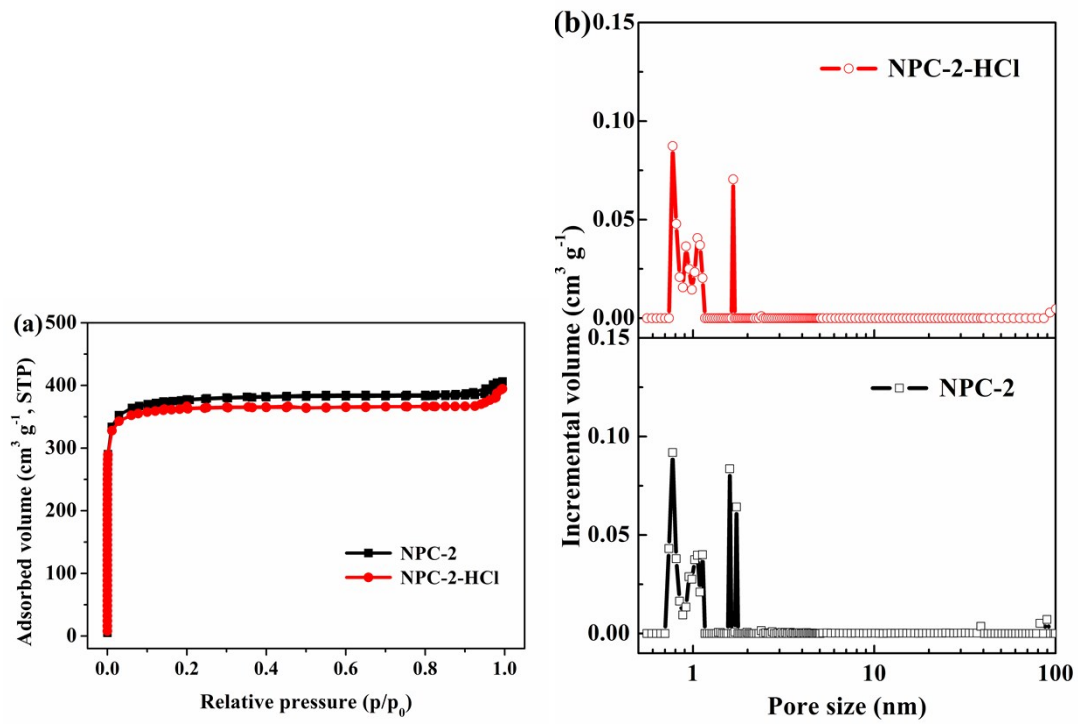

**Fig. S3** (a) N<sub>2</sub> sorption isotherms and (b) DFT pore size distributions for the NPC-2 and NPC-2-HCl.

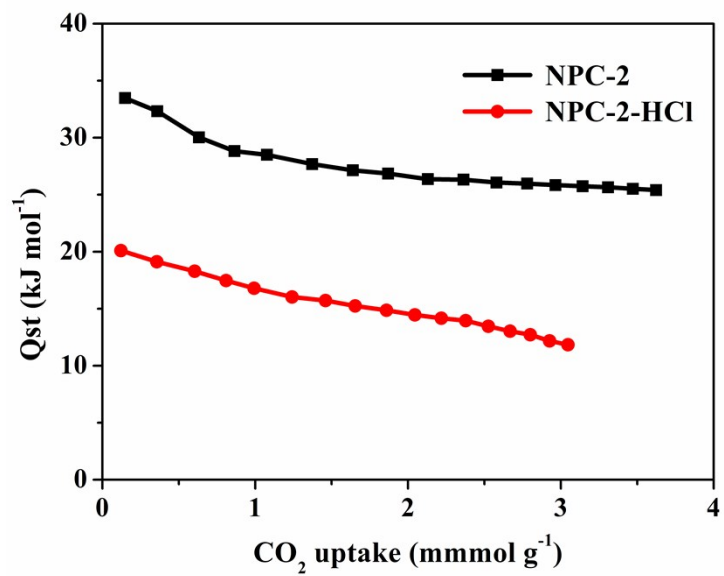

**Fig. S4** Isosteric heat of  $\text{CO}_2$  adsorption for NPC-2 and NPC-2-HCl.

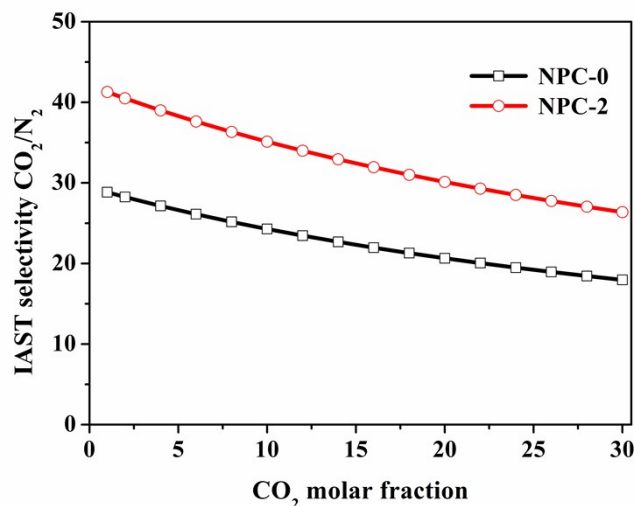

**Fig. S5** CO<sub>2</sub>/N<sub>2</sub> selectivity versus CO<sub>2</sub> molar fraction with the overall pressure of 1.0 bar. The calculations were based on the single-component gas adsorption data at 25 °C by the IAST method.

Firstly, the experimental single-component gas CO<sub>2</sub> adsorption isotherms of NPC-0 and NPC-2 can be modeled adequately using a single-site Langmuir model:<sup>1,2</sup>

$$q_i = q_{i,sat} \times \frac{b_i p_i}{1 + b_i p_i}$$

where  $b_i$  is the Langmuir constant, Pa<sup>-1</sup>;  $p_i$  is the bulk gas phase pressure of species  $i$ , Pa;  $q_i$  is the molar loading of species  $i$ , mmol g<sup>-1</sup>;  $q_{i,sat}$  is the saturation capacity of species  $i$ , mmol g<sup>-1</sup>.

The fitted parameters of the CO<sub>2</sub> adsorption isotherm data at 25 °C for NPC-0 and NPC-2 using a single-site Langmuir model are listed in the following table, which are aimed to enable application of IAST in simulating the property of each adsorbent under a mixed CO<sub>2</sub>/N<sub>2</sub> gas.

The fitted parameters derived from the single-site Langmuir model.

| Sample | $q_{i,sat}$ (mmol g <sup>-1</sup> ) | $b_i \times 10^5$ (Pa <sup>-1</sup> ) | R-square |
|--------|-------------------------------------|---------------------------------------|----------|
| NPC-0  | 4.4179                              | 2.130                                 | 0.9920   |
| NPC-2  | 5.7683                              | 1.987                                 | 0.9928   |

Reference:

- 1 Y. F. Zhao, X. Liu, K. X. Yao, L. Zhao, Y. Han. *Chem. Mater.*, 2012, **24**, 4725-4734.
- 2 J. A. Mason, K. Sumida, Z. R. Herm, R. Krishna, J. R. Long. *Energy Environ. Sci.*, 2011, **4**, 3030-3040.
